# Supplementary material for: Influence of sintering additives on densification and Li+ conductivity of Al doped Li7La3Zr2O12 lithium garnet
Source: Royal Society of Chemistry journal article supplement (doi:10.1039/c4ra08674k), 2014-01-01
Supplement: c4ra08674k1.pdf [file c4ra08674k1.pdf]

## Supporting Information

### Influence of sintering additives on densification and Li<sup>+</sup> conductivity of Al doped Li<sub>7</sub>La<sub>3</sub>Zr<sub>2</sub>O<sub>12</sub> lithium garnet

Narayanasamy Janani, C. Deviannapoorani, L. Dhivya and Ramaswamy Murugan\*

*Department of Physics, Pondicherry University, Puducherry - 605 014, India.*

\* Email: [moranamurugan.phy@pondiuni.edu.in](mailto:moranamurugan.phy@pondiuni.edu.in)

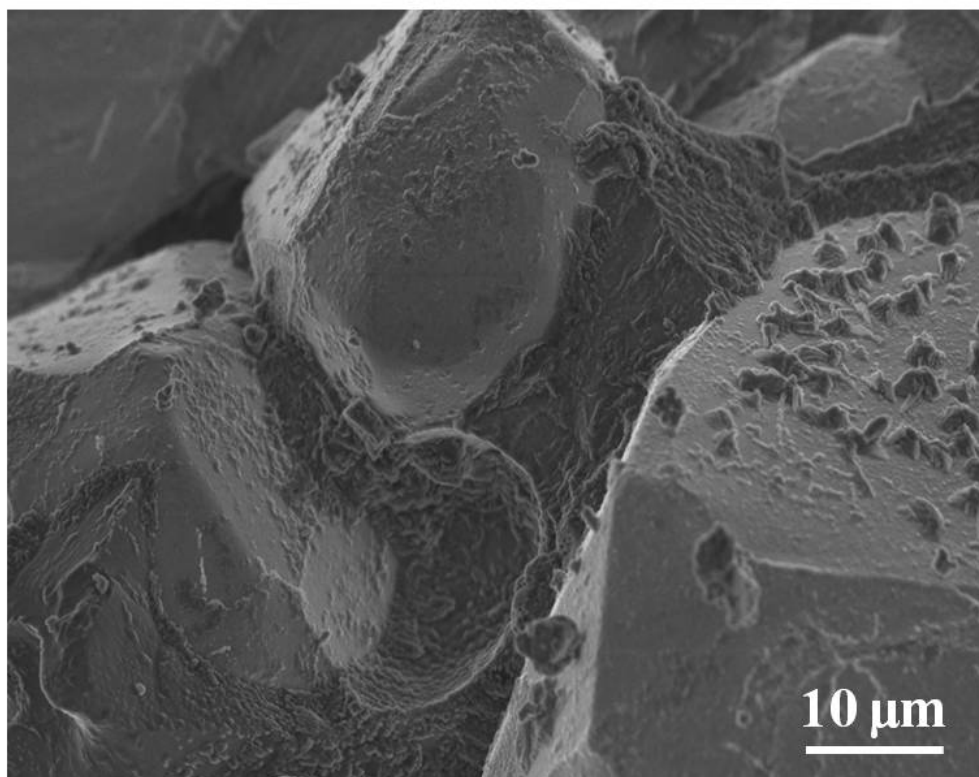

Fig. S1. FE-SEM image of Al-LLZ added with 1wt.% of  $\text{Li}_3\text{PO}_4$

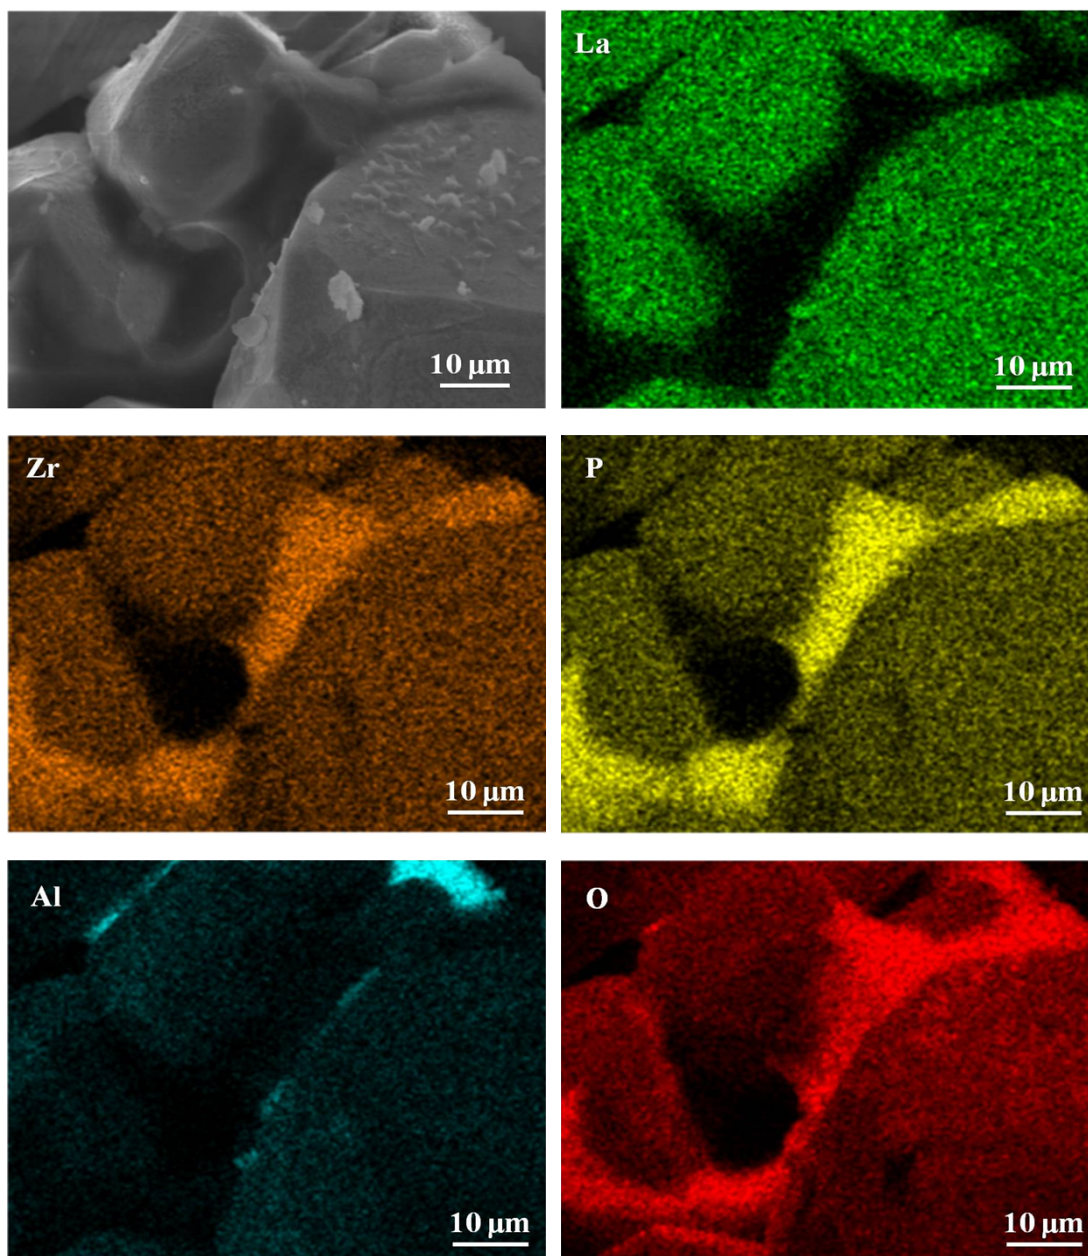

Fig. S2. FE-SEM and EDX Mapping image of Al-LLZ added with 1wt.% of  $\text{Li}_3\text{PO}_4$
